# Supplementary material
Source: PubMed Central journal article supplement (PMC4995112)
Supplement: NIHMS796248-supplement.pdf [file NIHMS796248-supplement.pdf]

**Supplementary Data for:**

**Water exit pathways and proton pumping  
mechanism in B-type Cytochrome *c* oxidase from  
molecular dynamics simulations**

Longhua Yang<sup>a,b</sup>, Åge A. Skjevik<sup>b,c</sup>, Wen-Ge Han Du<sup>d</sup>, Louis Noodleman<sup>d</sup>,  
Ross C. Walker<sup>b,c,\*</sup>, Andreas W. Götz<sup>b,\*</sup>

<sup>a</sup> Department of Chemistry, Nanchang University, 999 Xuefudadao, Nanchang, Jiangxi 330031, China

<sup>b</sup> San Diego Supercomputer Center, University of California San Diego, 9500 Gilman Drive MC0505, La Jolla, CA 92093, USA

<sup>c</sup> Department of Biomedicine, University of Bergen, N-5009 Bergen, Norway

<sup>d</sup> Department of Integrative Structural and Computational Biology, GAC1118, The Scripps Research Institute, 10550 North Torrey Pines Road, La Jolla, CA 92037, USA

<sup>e</sup> Department of Chemistry and Biochemistry, University of California San Diego, 9500 Gilman Drive, La Jolla, CA 92093, USA

\* To whom correspondence should be addressed:

AWG E-mail: agoetz@sdsc.edu, Tel: +1-858-822-4771

RCW E-mail: ross@rosswalker.co.uk, Tel: +1-858-822-0854

# Contents

|                                                                                                                                                                 |     |
|-----------------------------------------------------------------------------------------------------------------------------------------------------------------|-----|
| 1. H <sup>++</sup> parameters, protonation states                                                                                                               | S4  |
| <b>Table S1.</b> Non-standard protonation states of titratable residues as determined by H <sup>++</sup>                                                        |     |
| 2. Hydrogen bond analysis of states F to A                                                                                                                      | S5  |
| <b>Table S2.</b> Protonation states for states F to A                                                                                                           |     |
| <b>Table S3.</b> Hydrogen bond occupancies for states F to A                                                                                                    |     |
| 3. Coordinates and charges for the DNC and Cu <sub>A</sub> pair cofactor models                                                                                 | S6  |
| <b>Table S4.</b> DNC cluster model for charge derivation with deprotonated PRAa <sub>3</sub> .                                                                  |     |
| <b>Table S5.</b> DNC cluster model for charge derivation with protonated PRAa <sub>3</sub> .                                                                    |     |
| <b>Table S6.</b> Charges for backbone atoms of His and Tyr residues coordinating to the DNC metal atoms for deprotonated PRAa <sub>3</sub> .                    |     |
| <b>Table S7.</b> Charges for backbone atoms of His and Tyr residues coordinating to the DNC metal atoms for protonated PRAa <sub>3</sub> .                      |     |
| <b>Table S8.</b> Charges and coordinates for the Cu <sub>A</sub> cluster model.                                                                                 |     |
| <b>Table S9.</b> Charges for backbone atoms of His and Cys residues coordinating to the Cu <sub>A</sub> cluster model.                                          |     |
| <b>Table S10.</b> Charges and coordinates for the heme b cluster model.                                                                                         |     |
| <b>Table S11.</b> Charges for backbone atoms of His residues coordinating to the heme b cluster model.                                                          |     |
| 4. Stability of MD trajectories                                                                                                                                 | S21 |
| <b>Figure S1.</b> RMSD of CcO protein C $\alpha$ -backbone atoms for all simulations performed in this work                                                     |     |
| <b>Figure S2.</b> Area per lipid for simulation of state A                                                                                                      |     |
| 5. Distance analysis for the salt bridges Arg225–Asp287 and Arg225–Glu126 <sup>II</sup>                                                                         | S23 |
| <b>Figure S3.</b> Distances between the center of mass of sidechain groups for salt bridges Arg225-Asp287 and Arg225-Glu126 <sup>II</sup> in States A, D and E  |     |
| 6. Distance analysis for the residues on each side of the entrance of water pathway 2                                                                           | S24 |
| <b>Figure S4.</b> Center of mass distances of the side chain groups between residues Tyr136 and Arg225 and between residues Tyr136 and Trp229 in state E and F. |     |
| 7. Comparison of observed exit pathway P1 to pathway exit-R in aa <sub>3</sub> -type CcOs                                                                       | S25 |
| <b>Figure S5.</b> Water exit pathway P1 compared to work on aa <sub>3</sub> -type CcOs by Sugitani <i>et al.</i>                                                |     |



**8. Water occupancy of water exit pathways P1 and P2 for all simulations**

S26

**Figure S6.** Water occupancy isosurface plots for water exit pathway P1.

**Figure S7.** Water occupancy isosurface plots for water exit pathway P2.

## 1. H<sup>++</sup> parameters, protonation states

H<sup>++</sup> cannot recognize non-standard complex ligands such as heme automatically. We therefore manually supplied PQR files (PDB+charge+radius) with appropriate charges. For standard residues, the charges from the Amber ff12SB force field were used. The charges of cofactors were obtained through QM calculations as described in the methods section of the manuscript and in section 3 of this supporting information. The pH was set to 6.5. General atomic van der Waals radii were used (C: 1.70 Å; N: 1.55 Å; Fe: 1.00 Å; O: 1.50 Å; Cu: 1.40 Å; H: 1.20 Å).

All Arg, Tyr and Lys residues are predicted to be protonated with high pKa values (Arg > 11.7, Tyr > 8.9, Lys > 8.7). All but two Glu residues are predicted to have pKa values < 5.4, while Glu203 and Glu131<sup>II</sup> have pKa values of 7.0 and 6.7, respectively. We have assumed that all Glu residues in their standard, deprotonated state. All Asp residues apart from Asp372 have pKa values < 4.1 and are thus deprotonated. Most His residues have rather low pKa values while His462, His552, and His8<sup>II</sup> have pKa values around 6.7 and His376 has a pKa > 12. We have assumed that all His residues apart from His376 are in their default protonation state (singly protonated on the  $\epsilon$ -nitrogen atom).

**Table S1.** Non-standard protonation states of titratable residues and their pKa value as determined by H<sup>++</sup>.

| Residue | Protonation state | pKa  |
|---------|-------------------|------|
| Asp372  | protonated        | 10.1 |
| His376  | doubly protonated | > 12 |

The equilibrium protonation state thus has all residues in their default protonation state with the exception of Asp372, which is protonated and His376, which is doubly protonated. We refer to this as state D in the manuscript.

## 2. Hydrogen bond analysis of states F to A

These protonation states are equivalent to protonation states A to F in the mechanism presented in the manuscript (see Figure 1). The difference is that His376 is protonated at the other imidazole nitrogen atom.

**Table S2.** Molecular dynamics simulations of protonation states omitted in the manuscript (from state A' to state E'). These correspond to the states between state F and state A.

| Simulation No. | Protonation states/ Equivalent state |                   |                                |                                 |                               |
|----------------|--------------------------------------|-------------------|--------------------------------|---------------------------------|-------------------------------|
|                | PRAa <sub>3</sub> protonated         | Asp372 protonated | His376 protonated <sup>a</sup> | Glu126 <sup>II</sup> protonated | Equivalent state <sup>b</sup> |
| B'             | yes                                  | no                | δ                              | no                              | B                             |
| C'             | yes                                  | yes               | δ                              | no                              | C                             |
| E'             | no                                   | yes               | ε                              | yes                             | E                             |

a: ε=epsilon-protonated histidine; δ=delta-protonated histidine; ε,δ=doubly protonated histidine.

b: the corresponding states in the mechanism from state A to state F presented in Figure 1.

**Table S3.** Hydrogen bond occupancies for simulations of different protonation states omitted in the manuscript (state F to state A).<sup>a</sup>

| Simulation | Acceptor <sup>b</sup>   | Donor <sup>b</sup>      | Occupancy <sup>c</sup> |
|------------|-------------------------|-------------------------|------------------------|
| B'         | OD2(Asp372)             | O2A(PRAa <sub>3</sub> ) | 99.4%                  |
|            | OD1(Asp372)             | ND1(δ-His376)           | 80.9%                  |
|            | O(Asp372)               | N(δ-His376)             | 44.9%                  |
| C'         | O1A(PRAa <sub>3</sub> ) | OD2(Asp372H)            | 33.0%                  |
|            | OD1(PRAa <sub>3</sub> ) | OD2(Asp372H)            | 3.4%                   |
|            | NE2(δ-His376)           | O2A(PRAa <sub>3</sub> ) | 10.6%                  |
|            | O1A(PRAa <sub>3</sub> ) | ND1(δ-His376)           | 4.0%                   |
|            | OD1(Asp372H)            | ND1(δ-His376)           | 67.0%                  |
|            | O(Asp372H)              | N(δ-His376)             | 44.0%                  |
|            | OD1(Asp372H)            | O2A(PRAa <sub>3</sub> ) | 3.4%                   |
| E'         | O1A(PRAa <sub>3</sub> ) | OD2(Asp372H)            | 28.2%                  |
|            | O2A(PRAa <sub>3</sub> ) | OD2(Asp372H)            | 18.9%                  |
|            | O(Asp372H)              | N(ε-His376)             | 69.5%                  |

a: Only occupancies larger than 3% are listed.

b: Name of the heavy atom involved in the hydrogen bond, with the residue name in parenthesis.

c: Occupancy is the fraction of simulation frames during which the bond is present. Hydrogen bonds are defined through an angle cutoff of 135° and a distance cutoff of 3.0 Å between the hydrogen bonded atoms.

### 3. Coordinates and charges for the DNC, Cu<sub>A</sub> and heme b cofactors

The tables contain two sets of charges, ESP charges and final charges. The ESP charges were directly obtained from an ESP charge fit as outlined in the methods section of the manuscript. The final charges were obtained by a) averaging the charges on methyl group hydrogen atoms and b) scaling the charges of all atoms in the cluster model and the remaining backbone atoms of the coordinating residues such that the total charge is maintained after removing the hydrogen link atom.

The DNC cluster model includes heme a<sub>3</sub>, Cu<sub>B</sub>, and the side chains of residues His384, His283, His282, His233 and Tyr237. Charges for the DNC cluster models are shown together with their coordinates in Tables S4 and S5, while corresponding backbone charges are shown in Tables S6 and S7.

The Cu<sub>A</sub> pair cluster model contains the Cu<sub>A</sub> pair and the side chains of coordinating histidine and cysteine residues His114<sup>II</sup>, His157<sup>II</sup>, Cys149<sup>II</sup>, and Cys153<sup>II</sup>. Charges and coordinates for the Cu<sub>A</sub> pair are in table S8, and modified backbone charges in table S9.

The heme b cluster model used for the charge derivation contains the heme b group, His72, and His386. The charges for the cluster model and the backbone atoms are in tables S10 and S11, respectively.

**Table S4.** DNC cluster model for charge derivation with deprotonated PRA<sub>a3</sub>. The hydrogen link atoms have a zero final charge (atom number 145, 146, 147, 180, 192).

|    |   | Coordinates |          |         | ESP charge | Final charge |
|----|---|-------------|----------|---------|------------|--------------|
| 1  | H | 15.0919     | -13.8809 | 20.1325 | 0.0352     | 0.0362       |
| 2  | H | 16.6276     | -13.0180 | 20.0467 | 0.0451     | 0.0462       |
| 3  | H | 17.0009     | -14.5366 | 17.9313 | 0.0389     | 0.0400       |
| 4  | H | 15.7954     | -15.5568 | 18.7164 | 0.0842     | 0.0853       |
| 5  | H | 18.4473     | -14.8542 | 20.2099 | 0.1421     | 0.1432       |
| 6  | H | 17.2901     | -18.3890 | 18.7306 | 0.0520     | 0.0531       |
| 7  | H | 15.8539     | -17.4826 | 19.2064 | 0.0607     | 0.0618       |
| 8  | H | 16.6360     | -18.5198 | 20.2743 | 0.0695     | 0.0706       |
| 9  | C | 1.7052      | 5.0366   | 20.0171 | 0.0327     | 0.0338       |
| 10 | C | 2.5005      | 3.9189   | 19.4383 | -0.2017    | -0.2006      |
| 11 | N | 2.1330      | 2.5878   | 19.5847 | -0.1958    | -0.1947      |
| 12 | C | 3.7791      | 3.9715   | 18.9697 | -0.1289    | -0.1278      |
| 13 | C | 3.1731      | 1.8615   | 19.2102 | -0.0565    | -0.0554      |
| 14 | N | 4.2091      | 2.6648   | 18.8349 | 0.0185     | 0.0196       |
| 15 | H | 19.7420     | -17.4231 | 20.5996 | 0.0633     | 0.0644       |
| 16 | H | 18.4790     | -17.9990 | 21.6875 | 0.0595     | 0.0606       |

|    |   |         |          |         |         |         |
|----|---|---------|----------|---------|---------|---------|
| 17 | H | 0.6379  | 4.7971   | 20.0193 | -0.0093 | 0.0462  |
| 18 | H | 1.8414  | 5.9519   | 19.4298 | 0.0844  | 0.0462  |
| 19 | H | 4.4177  | 4.8066   | 18.7288 | 0.2145  | 0.2156  |
| 20 | H | 3.2385  | 0.7877   | 19.2139 | 0.1901  | 0.1912  |
| 21 | H | 19.0363 | -16.4097 | 21.7462 | 0.0438  | 0.0449  |
| 22 | C | 8.9253  | 3.5915   | 19.8306 | 0.1397  | 0.1408  |
| 23 | C | 7.9032  | 2.7638   | 19.1149 | -0.0565 | -0.0555 |
| 24 | C | 8.2584  | 1.6533   | 18.3216 | -0.2832 | -0.2822 |
| 25 | C | 6.5426  | 3.0546   | 19.2539 | -0.2839 | -0.2828 |
| 26 | C | 7.3024  | 0.8660   | 17.7217 | -0.2492 | -0.2481 |
| 27 | C | 5.5632  | 2.2892   | 18.6453 | 0.0752  | 0.0762  |
| 28 | C | 5.8940  | 1.1222   | 17.8509 | 0.2669  | 0.2680  |
| 29 | O | 5.0095  | 0.3853   | 17.3131 | -0.5142 | -0.5131 |
| 30 | H | 8.7263  | 4.6613   | 19.6959 | 0.0159  | 0.0170  |
| 31 | H | 9.9356  | 3.3733   | 19.4741 | 0.0114  | 0.0170  |
| 32 | H | 9.3105  | 1.4106   | 18.1889 | 0.2442  | 0.2453  |
| 33 | H | 6.2465  | 3.8911   | 19.8783 | 0.2195  | 0.2205  |
| 34 | H | 7.5943  | 0.0112   | 17.1170 | 0.1864  | 0.1875  |
| 35 | H | 7.6219  | -1.6739  | 21.4141 | 0.0342  | 0.0353  |
| 36 | C | -3.9015 | 1.7831   | 16.2314 | 0.1298  | 0.1308  |
| 37 | C | -2.5712 | 1.8074   | 16.8908 | -0.1190 | -0.1179 |
| 38 | N | -1.3792 | 1.9118   | 16.2100 | -0.1152 | -0.1141 |
| 39 | C | -2.2079 | 1.7375   | 18.2074 | -0.2345 | -0.2335 |
| 40 | C | -0.3650 | 1.9224   | 17.0959 | -0.2200 | -0.2189 |
| 41 | N | -0.8383 | 1.8181   | 18.3290 | -0.0926 | -0.0915 |
| 42 | H | -4.1527 | 0.7769   | 15.8744 | 0.0266  | 0.0257  |
| 43 | H | -3.9218 | 2.4631   | 15.3730 | 0.0122  | 0.0257  |
| 44 | H | -1.2717 | 1.9899   | 15.2023 | 0.3655  | 0.3665  |
| 45 | H | -2.8452 | 1.6487   | 19.0705 | 0.2440  | 0.2451  |
| 46 | H | 0.6708  | 2.0184   | 16.8138 | 0.2306  | 0.2317  |
| 47 | C | -4.8473 | 4.0392   | 21.4640 | 0.0533  | 0.0544  |
| 48 | C | -3.4886 | 3.4587   | 21.6105 | -0.1030 | -0.1019 |
| 49 | N | -3.1769 | 2.5046   | 22.5537 | -0.0825 | -0.0814 |
| 50 | C | -2.3513 | 3.5927   | 20.8591 | -0.2078 | -0.2067 |
| 51 | C | -1.9140 | 2.0896   | 22.3445 | -0.1487 | -0.1476 |
| 52 | N | -1.3768 | 2.7226   | 21.3093 | -0.2300 | -0.2289 |
| 53 | H | -4.8133 | 4.8994   | 20.7903 | 0.0625  | 0.0477  |
| 54 | H | -5.2545 | 4.3669   | 22.4261 | 0.0228  | 0.0477  |
| 55 | H | -3.7988 | 2.1687   | 23.2995 | 0.3363  | 0.3373  |
| 56 | H | -2.1921 | 4.2314   | 20.0038 | 0.2140  | 0.2151  |
| 57 | H | -1.4311 | 1.3352   | 22.9393 | 0.2075  | 0.2086  |

|    |    |         |          |         |         |         |
|----|----|---------|----------|---------|---------|---------|
| 58 | H  | 3.8308  | -1.2935  | 25.7518 | 0.2184  | 0.2195  |
| 59 | O  | 1.9694  | -0.4511  | 21.5257 | -0.3621 | -0.3610 |
| 60 | O  | 0.8883  | 0.5650   | 21.8126 | -0.2053 | -0.2042 |
| 61 | H  | 5.8797  | -1.9695  | 25.8732 | 0.2219  | 0.2230  |
| 62 | H  | 8.0960  | -1.0879  | 25.8925 | 0.1986  | 0.1997  |
| 63 | H  | 8.1053  | -0.8938  | 24.0480 | 0.2087  | 0.2098  |
| 64 | H  | 5.5243  | -2.9624  | 19.8722 | 0.1934  | 0.1945  |
| 65 | H  | 4.2108  | -3.5199  | 16.2748 | 0.1501  | 0.1512  |
| 66 | C  | 18.7850 | -17.1890 | 21.0420 | -0.0417 | -0.0407 |
| 67 | C  | 17.6370 | -15.4070 | 19.7580 | -0.1812 | -0.1801 |
| 68 | H  | 2.2678  | -3.3433  | 15.6797 | 0.0394  | 0.0404  |
| 69 | H  | 0.8434  | -4.0948  | 16.4115 | 0.0312  | 0.0323  |
| 70 | H  | 0.9006  | -2.3415  | 16.1811 | 0.0420  | 0.0431  |
| 71 | H  | -0.5438 | -2.5978  | 18.0708 | 0.2077  | 0.2088  |
| 72 | H  | -4.1202 | -1.5898  | 19.1771 | 0.1274  | 0.1284  |
| 73 | H  | -4.3550 | -0.4799  | 21.1809 | 0.0361  | 0.0372  |
| 74 | H  | -3.8374 | -0.7215  | 22.8268 | 0.0389  | 0.0399  |
| 75 | C  | -0.0504 | -7.2186  | 24.2237 | 0.0790  | 0.0801  |
| 76 | C  | 0.6855  | -6.1386  | 23.5033 | -0.1353 | -0.1342 |
| 77 | N  | 1.6740  | -6.3813  | 22.5761 | -0.0062 | -0.0051 |
| 78 | C  | 0.5171  | -4.7753  | 23.4703 | -0.3402 | -0.3391 |
| 79 | C  | 2.0667  | -5.2166  | 22.0289 | -0.2785 | -0.2774 |
| 80 | N  | 1.3804  | -4.2092  | 22.5483 | -0.1384 | -0.1374 |
| 81 | H  | -0.5938 | -7.8401  | 23.5005 | 0.0346  | 0.0444  |
| 82 | H  | -0.7849 | -6.7658  | 24.8951 | 0.0698  | 0.0444  |
| 83 | H  | 2.0554  | -7.2912  | 22.3316 | 0.3357  | 0.3368  |
| 84 | H  | -0.1680 | -4.1808  | 24.0514 | 0.2395  | 0.2406  |
| 85 | H  | 2.8329  | -5.1513  | 21.2770 | 0.2045  | 0.2055  |
| 86 | H  | -5.1647 | -2.8448  | 21.0769 | -0.0764 | -0.0754 |
| 87 | C  | 6.8030  | -7.9630  | 15.0190 | -0.0407 | -0.0396 |
| 88 | H  | 1.4274  | 1.1326   | 22.4077 | 0.2502  | 0.2513  |
| 89 | H  | 7.9427  | -2.8246  | 22.7205 | 0.0457  | 0.0468  |
| 90 | H  | -1.9426 | 1.1189   | 25.6722 | -0.0863 | -0.0852 |
| 91 | H  | -0.7758 | 1.2841   | 26.9937 | -0.0604 | -0.0593 |
| 92 | H  | -1.1161 | -1.1334  | 27.5814 | 0.0573  | 0.0584  |
| 93 | H  | -2.2045 | -1.3205  | 26.2201 | 0.0227  | 0.0237  |
| 94 | H  | 2.6225  | -1.3856  | 27.6150 | 0.0147  | 0.0158  |
| 95 | H  | 2.1009  | 0.2953   | 27.4412 | 0.0378  | 0.0389  |
| 96 | H  | 1.0250  | -0.8921  | 28.1904 | 0.0220  | 0.0230  |
| 97 | H  | -2.2682 | -1.2859  | 24.0422 | 0.1871  | 0.1882  |
| 98 | Fe | 1.6141  | -2.1268  | 21.9575 | 0.4395  | 0.4405  |

|     |   |         |         |         |         |         |
|-----|---|---------|---------|---------|---------|---------|
| 99  | C | -1.3346 | -1.4745 | 23.5349 | -0.0272 | -0.0261 |
| 100 | C | -0.0124 | -2.5249 | 19.0104 | -0.1332 | -0.1321 |
| 101 | C | 4.5890  | -2.8159 | 20.3851 | -0.0531 | -0.0520 |
| 102 | C | 3.3003  | -1.5397 | 24.8408 | -0.1930 | -0.1919 |
| 103 | N | 1.0789  | -1.6410 | 23.8254 | 0.1781  | 0.1792  |
| 104 | C | -0.1873 | -1.4132 | 24.2971 | -0.1301 | -0.1290 |
| 105 | C | -0.1482 | -1.0686 | 25.7005 | -0.2147 | -0.2136 |
| 106 | C | 1.1727  | -1.0627 | 26.0609 | -0.0519 | -0.0508 |
| 107 | C | 1.9198  | -1.4256 | 24.8777 | -0.1759 | -0.1748 |
| 108 | C | 1.7602  | -0.7480 | 27.3938 | 0.1017  | 0.1028  |
| 109 | O | -2.8389 | -2.3055 | 17.7965 | -0.4954 | -0.4944 |
| 110 | C | -1.3252 | -0.7663 | 26.5701 | 0.0598  | 0.0609  |
| 111 | C | -1.6614 | 0.7362  | 26.6566 | 0.2609  | 0.2620  |
| 112 | C | -2.7853 | 0.9669  | 27.6592 | 0.4787  | 0.4798  |
| 113 | O | -2.4948 | 0.9059  | 28.8815 | -0.7587 | -0.7576 |
| 114 | O | -3.9714 | 1.1442  | 27.2059 | -0.7640 | -0.7629 |
| 115 | N | 2.1724  | -2.6752 | 20.0848 | 0.0876  | 0.0887  |
| 116 | C | 1.3481  | -2.7453 | 18.9983 | -0.1616 | -0.1605 |
| 117 | C | 2.1030  | -3.0591 | 17.8035 | -0.0964 | -0.0953 |
| 118 | C | 3.4106  | -3.1704 | 18.1919 | -0.0752 | -0.0741 |
| 119 | C | 3.4394  | -2.8982 | 19.6173 | 0.0380  | 0.0390  |
| 120 | C | 1.5026  | -3.2181 | 16.4479 | 0.0408  | 0.0419  |
| 121 | N | 3.5648  | -2.2357 | 22.5255 | 0.0598  | 0.0609  |
| 122 | C | 4.6471  | -2.4888 | 21.7285 | -0.2038 | -0.2027 |
| 123 | C | 5.8788  | -2.3386 | 22.4712 | -0.0753 | -0.0742 |
| 124 | C | 5.5164  | -1.9723 | 23.7450 | -0.0284 | -0.0274 |
| 125 | C | 4.0628  | -1.9142 | 23.7524 | -0.0777 | -0.0766 |
| 126 | C | 7.2416  | -2.5720 | 21.9207 | 0.0711  | 0.0722  |
| 127 | C | 6.3393  | -1.7205 | 24.9167 | -0.2565 | -0.2555 |
| 128 | C | 7.5808  | -1.2139 | 24.9432 | -0.3863 | -0.3853 |
| 129 | N | -0.3164 | -2.0543 | 21.3867 | 0.0920  | 0.0931  |
| 130 | C | -0.7816 | -2.2003 | 20.1159 | -0.1840 | -0.1829 |
| 131 | C | -2.2022 | -1.9401 | 20.0820 | 0.0182  | 0.0193  |
| 132 | C | -2.5856 | -1.6360 | 21.3779 | -0.1942 | -0.1932 |
| 133 | C | -1.3946 | -1.7272 | 22.1719 | -0.1071 | -0.1060 |
| 134 | C | -3.1014 | -1.9481 | 18.9466 | 0.2491  | 0.2501  |
| 135 | C | -3.9369 | -1.2284 | 21.8667 | 0.0210  | 0.0221  |
| 136 | C | -4.9505 | -2.3656 | 22.0367 | 0.2532  | 0.2543  |
| 137 | C | -6.2418 | -1.8845 | 22.6968 | 0.5372  | 0.5383  |
| 138 | O | -7.3503 | -2.2440 | 22.1689 | -0.7923 | -0.7913 |
| 139 | O | -6.1501 | -1.1874 | 23.7390 | -0.7474 | -0.7464 |

|     |    |         |          |         |         |         |
|-----|----|---------|----------|---------|---------|---------|
| 140 | C  | 12.4300 | -8.1250  | 17.4050 | -0.0016 | -0.0005 |
| 141 | C  | 16.5530 | -14.8040 | 18.8770 | -0.0331 | -0.0320 |
| 142 | C  | 16.8450 | -17.7870 | 19.5090 | -0.0677 | -0.0666 |
| 143 | C  | 17.7330 | -16.6840 | 20.0880 | -0.2765 | -0.2754 |
| 144 | Cu | 0.2004  | 2.0169   | 20.0962 | 0.5441  | 0.5452  |
| 145 | H  | 8.8911  | 3.3924   | 20.9134 | 0.0204  | 0.0000  |
| 146 | H  | -4.6733 | 2.1049   | 16.9383 | 0.0350  | 0.0000  |
| 147 | H  | -5.5315 | 3.2947   | 21.0321 | 0.0545  | 0.0000  |
| 148 | H  | 7.2455  | -3.3914  | 21.1959 | 0.0172  | 0.0182  |
| 149 | H  | -4.5255 | -3.1394  | 22.6939 | -0.0567 | -0.0557 |
| 150 | H  | 0.5853  | -7.8951  | 24.8206 | 0.0257  | 0.0000  |
| 151 | C  | 4.5067  | -3.4170  | 17.2279 | 0.0169  | 0.0180  |
| 152 | O  | 5.3603  | -2.3076  | 17.2075 | -0.4783 | -0.4772 |
| 153 | C  | 5.1040  | -4.8050  | 17.5250 | 0.1115  | 0.1125  |
| 154 | C  | 6.1600  | -5.2870  | 16.4770 | -0.0843 | -0.0832 |
| 155 | C  | 7.1680  | -6.3090  | 16.8880 | -0.3044 | -0.3033 |
| 156 | C  | 7.3270  | -7.5380  | 16.3810 | -0.1688 | -0.1677 |
| 157 | C  | 8.1390  | -8.6170  | 17.0680 | 0.0037  | 0.0048  |
| 158 | C  | 9.5840  | -8.6600  | 16.4480 | -0.0771 | -0.0760 |
| 159 | C  | 10.4260 | -9.6870  | 17.2000 | -0.2850 | -0.2839 |
| 160 | C  | 11.6400 | -9.4220  | 17.7130 | -0.2017 | -0.2007 |
| 161 | C  | 12.2440 | -10.5320 | 18.5670 | -0.0420 | -0.0409 |
| 162 | C  | 13.2020 | -11.3920 | 17.7400 | -0.0767 | -0.0756 |
| 163 | C  | 13.9360 | -12.4900 | 18.4300 | -0.2284 | -0.2273 |
| 164 | C  | 15.2740 | -12.5690 | 18.4610 | -0.2221 | -0.2211 |
| 165 | C  | 15.8830 | -13.5520 | 19.4750 | -0.0339 | -0.0329 |
| 166 | C  | 16.2360 | -11.6990 | 17.6670 | -0.0435 | -0.0424 |
| 167 | H  | 5.5554  | -2.0706  | 16.2979 | 0.3859  | 0.3869  |
| 168 | H  | 5.5759  | -4.7629  | 18.4956 | -0.0259 | -0.0249 |
| 169 | H  | 4.2928  | -5.5175  | 17.5497 | -0.0134 | -0.0123 |
| 170 | H  | 6.7264  | -4.4282  | 16.1483 | 0.0384  | 0.0395  |
| 171 | H  | 5.6321  | -5.7132  | 15.6367 | 0.0880  | 0.0891  |
| 172 | H  | 7.8914  | -6.1326  | 17.6702 | 0.1941  | 0.1952  |
| 173 | H  | 7.4692  | -7.7919  | 14.1864 | 0.0418  | 0.0429  |
| 174 | H  | 5.8137  | -7.6108  | 14.7668 | 0.0547  | 0.0558  |
| 175 | H  | 6.6789  | -9.0357  | 14.9997 | 0.0547  | 0.0558  |
| 176 | H  | 7.6436  | -9.5662  | 16.9267 | 0.0687  | 0.0697  |
| 177 | H  | 8.1919  | -8.3920  | 18.1230 | 0.0102  | 0.0112  |
| 178 | H  | 10.0542 | -7.6916  | 16.5344 | 0.1051  | 0.1061  |
| 179 | H  | 9.5333  | -8.9440  | 15.4072 | 0.0755  | 0.0766  |
| 180 | H  | 10.1318 | -10.7088 | 17.3890 | 0.1909  | 0.1920  |



|     |   |         |          |         |        |        |
|-----|---|---------|----------|---------|--------|--------|
| 181 | H | 13.4301 | -8.0722  | 17.8092 | 0.0692 | 0.0702 |
| 182 | H | 11.9129 | -7.1974  | 17.6015 | 0.0403 | 0.0414 |
| 183 | H | 12.6135 | -8.0589  | 16.3428 | 0.0310 | 0.0321 |
| 184 | H | 11.4492 | -11.1542 | 18.9510 | 0.0697 | 0.0708 |
| 185 | H | 12.7845 | -10.0894 | 19.3906 | 0.0288 | 0.0299 |
| 186 | H | 13.9508 | -10.7400 | 17.3150 | 0.1172 | 0.1183 |
| 187 | H | 12.6332 | -11.8527 | 16.9459 | 0.0377 | 0.0387 |
| 188 | H | 13.4548 | -13.3019 | 18.9550 | 0.1808 | 0.1819 |
| 189 | H | 17.2155 | -11.5657 | 18.1020 | 0.0878 | 0.0888 |
| 190 | H | 15.8495 | -10.7416 | 17.3500 | 0.0395 | 0.0406 |
| 191 | H | 16.4637 | -12.1795 | 16.7269 | 0.0564 | 0.0575 |
| 192 | H | 1.8223  | 5.4178   | 21.0208 | 0.0604 | 0.0000 |

**Table S5.** DNC cluster model for charge derivation with protonated PRAa<sub>3</sub>. The hydrogen link atoms have a zero final charge (atom number 145, 146, 147, 180, 192)

|    |   | Coordinates |          |         | ESP charge | Charge-derived |
|----|---|-------------|----------|---------|------------|----------------|
| 1  | H | 15.0919     | -13.8809 | 20.1325 | 0.03464    | 0.0357         |
| 2  | H | 16.6276     | -13.0180 | 20.0467 | 0.04487    | 0.0460         |
| 3  | H | 17.0009     | -14.5366 | 17.9313 | 0.03890    | 0.0400         |
| 4  | H | 15.7954     | -15.5568 | 18.7164 | 0.08353    | 0.0846         |
| 5  | H | 18.4473     | -14.8542 | 20.2099 | 0.14199    | 0.1431         |
| 6  | H | 17.2901     | -18.3890 | 18.7306 | 0.05167    | 0.0528         |
| 7  | H | 15.8539     | -17.4826 | 19.2064 | 0.06116    | 0.0623         |
| 8  | H | 16.6360     | -18.5198 | 20.2743 | 0.07002    | 0.0711         |
| 9  | C | 1.7052      | 5.0366   | 20.0171 | 0.02779    | 0.0289         |
| 10 | C | 2.5005      | 3.9189   | 19.4383 | -0.20565   | -0.2045        |
| 11 | N | 2.1330      | 2.5878   | 19.5847 | -0.18695   | -0.1858        |
| 12 | C | 3.7791      | 3.9715   | 18.9697 | -0.12277   | -0.1217        |
| 13 | C | 3.1731      | 1.8615   | 19.2102 | -0.06442   | -0.0633        |
| 14 | N | 4.2091      | 2.6648   | 18.8349 | 0.01935    | 0.0205         |
| 15 | H | 19.7420     | -17.4231 | 20.5996 | 0.06167    | 0.0628         |
| 16 | H | 18.4790     | -17.9990 | 21.6875 | 0.05934    | 0.0604         |
| 17 | H | 0.6379      | 4.7971   | 20.0193 | -0.00805   | 0.0477         |
| 18 | H | 1.8414      | 5.9519   | 19.4298 | 0.08630    | 0.0477         |
| 19 | H | 4.4177      | 4.8066   | 18.7288 | 0.21341    | 0.2145         |
| 20 | H | 3.2385      | 0.7877   | 19.2139 | 0.19226    | 0.1934         |
| 21 | H | 19.0363     | -16.4097 | 21.7462 | 0.04302    | 0.0441         |
| 22 | C | 8.9253      | 3.5915   | 19.8306 | 0.14331    | 0.1444         |
| 23 | C | 7.9032      | 2.7638   | 19.1149 | -0.05221   | -0.0511        |
| 24 | C | 8.2584      | 1.6533   | 18.3216 | -0.28197   | -0.2809        |
| 25 | C | 6.5426      | 3.0546   | 19.2539 | -0.28260   | -0.2815        |

|    |   |         |          |         |          |         |
|----|---|---------|----------|---------|----------|---------|
| 26 | C | 7.3024  | 0.8660   | 17.7217 | -0.24689 | -0.2458 |
| 27 | C | 5.5632  | 2.2892   | 18.6453 | 0.07542  | 0.0765  |
| 28 | C | 5.8940  | 1.1222   | 17.8509 | 0.26980  | 0.2709  |
| 29 | O | 5.0095  | 0.3853   | 17.3131 | -0.50944 | -0.5083 |
| 30 | H | 8.7263  | 4.6613   | 19.6959 | 0.01528  | 0.0164  |
| 31 | H | 9.9356  | 3.3733   | 19.4741 | 0.01016  | 0.0164  |
| 32 | H | 9.3105  | 1.4106   | 18.1889 | 0.24483  | 0.2459  |
| 33 | H | 6.2465  | 3.8911   | 19.8783 | 0.21940  | 0.2205  |
| 34 | H | 7.5943  | 0.0112   | 17.1170 | 0.18729  | 0.1884  |
| 35 | H | 7.6219  | -1.6739  | 21.4141 | 0.03636  | 0.0375  |
| 36 | C | -3.9015 | 1.7831   | 16.2314 | 0.11867  | 0.1198  |
| 37 | C | -2.5712 | 1.8074   | 16.8908 | -0.12455 | -0.1234 |
| 38 | N | -1.3792 | 1.9118   | 16.2100 | -0.11517 | -0.1141 |
| 39 | C | -2.2079 | 1.7375   | 18.2074 | -0.21990 | -0.2188 |
| 40 | C | -0.3650 | 1.9224   | 17.0959 | -0.21124 | -0.2101 |
| 41 | N | -0.8383 | 1.8181   | 18.3290 | -0.10582 | -0.1047 |
| 42 | H | -4.1527 | 0.7769   | 15.8744 | 0.02983  | 0.0296  |
| 43 | H | -3.9218 | 2.4631   | 15.3730 | 0.01724  | 0.0296  |
| 44 | H | -1.2717 | 1.9899   | 15.2023 | 0.36576  | 0.3669  |
| 45 | H | -2.8452 | 1.6487   | 19.0705 | 0.23510  | 0.2362  |
| 46 | H | 0.6708  | 2.0184   | 16.8138 | 0.22927  | 0.2304  |
| 47 | C | -4.8473 | 4.0392   | 21.4640 | 0.05825  | 0.0594  |
| 48 | C | -3.4886 | 3.4587   | 21.6105 | -0.10907 | -0.1080 |
| 49 | N | -3.1769 | 2.5046   | 22.5537 | -0.07763 | -0.0765 |
| 50 | C | -2.3513 | 3.5927   | 20.8591 | -0.20215 | -0.2010 |
| 51 | C | -1.9140 | 2.0896   | 22.3445 | -0.15477 | -0.1537 |
| 52 | N | -1.3768 | 2.7226   | 21.3093 | -0.22662 | -0.2255 |
| 53 | H | -4.8133 | 4.8994   | 20.7903 | 0.06117  | 0.0482  |
| 54 | H | -5.2545 | 4.3669   | 22.4261 | 0.02591  | 0.0482  |
| 55 | H | -3.7988 | 2.1687   | 23.2995 | 0.32753  | 0.3286  |
| 56 | H | -2.1921 | 4.2314   | 20.0038 | 0.21467  | 0.2158  |
| 57 | H | -1.4311 | 1.3352   | 22.9393 | 0.20892  | 0.2100  |
| 58 | H | 3.8308  | -1.2935  | 25.7518 | 0.21975  | 0.2209  |
| 59 | O | 1.9694  | -0.4511  | 21.5257 | -0.36285 | -0.3617 |
| 60 | O | 0.8883  | 0.5650   | 21.8126 | -0.20913 | -0.2080 |
| 61 | H | 5.8797  | -1.9695  | 25.8732 | 0.22303  | 0.2241  |
| 62 | H | 8.0960  | -1.0879  | 25.8925 | 0.19806  | 0.1992  |
| 63 | H | 8.1053  | -0.8938  | 24.0480 | 0.20782  | 0.2089  |
| 64 | H | 5.5243  | -2.9624  | 19.8722 | 0.19340  | 0.1945  |
| 65 | H | 4.2108  | -3.5199  | 16.2748 | 0.14869  | 0.1498  |
| 66 | C | 18.7850 | -17.1890 | 21.0420 | -0.03964 | -0.0385 |

|     |    |         |          |         |          |         |
|-----|----|---------|----------|---------|----------|---------|
| 67  | C  | 17.6370 | -15.4070 | 19.7580 | -0.18148 | -0.1804 |
| 68  | H  | 2.2678  | -3.3433  | 15.6797 | 0.04014  | 0.0412  |
| 69  | H  | 0.8434  | -4.0948  | 16.4115 | 0.03248  | 0.0336  |
| 70  | H  | 0.9006  | -2.3415  | 16.1811 | 0.04165  | 0.0428  |
| 71  | H  | -0.5438 | -2.5978  | 18.0708 | 0.20736  | 0.2085  |
| 72  | H  | -4.1202 | -1.5898  | 19.1771 | 0.12690  | 0.1280  |
| 73  | H  | -4.3550 | -0.4799  | 21.1809 | 0.04307  | 0.0442  |
| 74  | H  | -3.8374 | -0.7215  | 22.8268 | 0.03348  | 0.0346  |
| 75  | C  | -0.0504 | -7.2186  | 24.2237 | 0.07265  | 0.0738  |
| 76  | C  | 0.6855  | -6.1386  | 23.5033 | -0.13931 | -0.1382 |
| 77  | N  | 1.6740  | -6.3813  | 22.5761 | -0.00299 | -0.0019 |
| 78  | C  | 0.5171  | -4.7753  | 23.4703 | -0.33406 | -0.3330 |
| 79  | C  | 2.0667  | -5.2166  | 22.0289 | -0.27973 | -0.2786 |
| 80  | N  | 1.3804  | -4.2092  | 22.5483 | -0.14100 | -0.1399 |
| 81  | H  | -0.5938 | -7.8401  | 23.5005 | 0.03766  | 0.0471  |
| 82  | H  | -0.7849 | -6.7658  | 24.8951 | 0.07105  | 0.0471  |
| 83  | H  | 2.0554  | -7.2912  | 22.3316 | 0.33550  | 0.3366  |
| 84  | H  | -0.1680 | -4.1808  | 24.0514 | 0.23665  | 0.2378  |
| 85  | H  | 2.8329  | -5.1513  | 21.2770 | 0.20605  | 0.2072  |
| 86  | H  | -5.1647 | -2.8448  | 21.0769 | -0.00939 | -0.0083 |
| 87  | C  | 6.8030  | -7.9630  | 15.0190 | -0.04034 | -0.0392 |
| 88  | H  | 1.4274  | 1.1326   | 22.4077 | 0.25145  | 0.2526  |
| 89  | H  | 7.9427  | -2.8246  | 22.7205 | 0.04831  | 0.0494  |
| 90  | H  | -1.9426 | 1.1189   | 25.6722 | -0.07844 | -0.0773 |
| 91  | H  | -0.7758 | 1.2841   | 26.9937 | -0.05003 | -0.0489 |
| 92  | H  | -1.1161 | -1.1334  | 27.5814 | 0.06431  | 0.0654  |
| 93  | H  | -2.2045 | -1.3205  | 26.2201 | 0.02458  | 0.0257  |
| 94  | H  | 2.6225  | -1.3856  | 27.6150 | 0.01720  | 0.0183  |
| 95  | H  | 2.1009  | 0.2953   | 27.4412 | 0.03969  | 0.0408  |
| 96  | H  | 1.0250  | -0.8921  | 28.1904 | 0.02342  | 0.0245  |
| 97  | H  | -2.2682 | -1.2859  | 24.0422 | 0.19664  | 0.1977  |
| 98  | Fe | 1.6141  | -2.1268  | 21.9575 | 0.44011  | 0.4412  |
| 99  | C  | -1.3346 | -1.4745  | 23.5349 | -0.03721 | -0.0361 |
| 100 | C  | -0.0124 | -2.5249  | 19.0104 | -0.13091 | -0.1298 |
| 101 | C  | 4.5890  | -2.8159  | 20.3851 | -0.05041 | -0.0493 |
| 102 | C  | 3.3003  | -1.5397  | 24.8408 | -0.19502 | -0.1939 |
| 103 | N  | 1.0789  | -1.6410  | 23.8254 | 0.18076  | 0.1819  |
| 104 | C  | -0.1873 | -1.4132  | 24.2971 | -0.12683 | -0.1257 |
| 105 | C  | -0.1482 | -1.0686  | 25.7005 | -0.21019 | -0.2091 |
| 106 | C  | 1.1727  | -1.0627  | 26.0609 | -0.05144 | -0.0503 |
| 107 | C  | 1.9198  | -1.4256  | 24.8777 | -0.17431 | -0.1732 |

|     |    |         |          |         |          |         |
|-----|----|---------|----------|---------|----------|---------|
| 108 | C  | 1.7602  | -0.7480  | 27.3938 | 0.09725  | 0.0984  |
| 109 | O  | -2.8389 | -2.3055  | 17.7965 | -0.48943 | -0.4883 |
| 110 | C  | -1.3252 | -0.7663  | 26.5701 | 0.04694  | 0.0480  |
| 111 | C  | -1.6614 | 0.7362   | 26.6566 | 0.23613  | 0.2372  |
| 112 | C  | -2.7853 | 0.9669   | 27.6592 | 0.47523  | 0.4763  |
| 113 | O  | -2.4948 | 0.9059   | 28.8815 | -0.75280 | -0.7517 |
| 114 | O  | -3.9714 | 1.1442   | 27.2059 | -0.75699 | -0.7559 |
| 115 | N  | 2.1724  | -2.6752  | 20.0848 | 0.08756  | 0.0887  |
| 116 | C  | 1.3481  | -2.7453  | 18.9983 | -0.16167 | -0.1606 |
| 117 | C  | 2.1030  | -3.0591  | 17.8035 | -0.09793 | -0.0968 |
| 118 | C  | 3.4106  | -3.1704  | 18.1919 | -0.07031 | -0.0692 |
| 119 | C  | 3.4394  | -2.8982  | 19.6173 | 0.03500  | 0.0361  |
| 120 | C  | 1.5026  | -3.2181  | 16.4479 | 0.04137  | 0.0425  |
| 121 | N  | 3.5648  | -2.2357  | 22.5255 | 0.05137  | 0.0525  |
| 122 | C  | 4.6471  | -2.4888  | 21.7285 | -0.19556 | -0.1945 |
| 123 | C  | 5.8788  | -2.3386  | 22.4712 | -0.07700 | -0.0759 |
| 124 | C  | 5.5164  | -1.9723  | 23.7450 | -0.02498 | -0.0239 |
| 125 | C  | 4.0628  | -1.9142  | 23.7524 | -0.06980 | -0.0687 |
| 126 | C  | 7.2416  | -2.5720  | 21.9207 | 0.06528  | 0.0664  |
| 127 | C  | 6.3393  | -1.7205  | 24.9167 | -0.26082 | -0.2597 |
| 128 | C  | 7.5808  | -1.2139  | 24.9432 | -0.38052 | -0.3794 |
| 129 | N  | -0.3164 | -2.0543  | 21.3867 | 0.09934  | 0.1004  |
| 130 | C  | -0.7816 | -2.2003  | 20.1159 | -0.18319 | -0.1821 |
| 131 | C  | -2.2022 | -1.9401  | 20.0820 | 0.00919  | 0.0103  |
| 132 | C  | -2.5856 | -1.6360  | 21.3779 | -0.16610 | -0.1650 |
| 133 | C  | -1.3946 | -1.7272  | 22.1719 | -0.13020 | -0.1291 |
| 134 | C  | -3.1014 | -1.9481  | 18.9466 | 0.25222  | 0.2533  |
| 135 | C  | -3.9369 | -1.2284  | 21.8667 | 0.03232  | 0.0334  |
| 136 | C  | -4.9505 | -2.3656  | 22.0367 | 0.17618  | 0.1773  |
| 137 | C  | -6.2418 | -1.8845  | 22.6968 | 0.46496  | 0.4661  |
| 138 | O  | -7.3503 | -2.2440  | 22.1689 | -0.62648 | -0.6254 |
| 139 | O  | -6.1501 | -1.1874  | 23.7390 | -0.42985 | -0.4287 |
| 140 | C  | 12.4300 | -8.1250  | 17.4050 | -0.00022 | 0.0009  |
| 141 | C  | 16.5530 | -14.8040 | 18.8770 | -0.03241 | -0.0313 |
| 142 | C  | 16.8450 | -17.7870 | 19.5090 | -0.06797 | -0.0669 |
| 143 | C  | 17.7330 | -16.6840 | 20.0880 | -0.27605 | -0.2749 |
| 144 | Cu | 0.2004  | 2.0169   | 20.0962 | 0.54198  | 0.5431  |
| 145 | H  | 8.8911  | 3.3924   | 20.9134 | 0.02044  | 0.0000  |
| 146 | H  | -4.6733 | 2.1049   | 16.9383 | 0.03827  | 0.0000  |
| 147 | H  | -5.5315 | 3.2947   | 21.0321 | 0.05410  | 0.0000  |
| 148 | H  | 7.2455  | -3.3914  | 21.1959 | 0.01941  | 0.0205  |

|     |   |         |          |         |          |         |
|-----|---|---------|----------|---------|----------|---------|
| 149 | H | -4.5255 | -3.1394  | 22.6939 | 0.00640  | 0.0075  |
| 150 | H | 0.5853  | -7.8951  | 24.8206 | 0.02921  | 0.0000  |
| 151 | C | 4.5067  | -3.4170  | 17.2279 | 0.01985  | 0.0210  |
| 152 | O | 5.3603  | -2.3076  | 17.2075 | -0.48081 | -0.4797 |
| 153 | C | 5.1040  | -4.8050  | 17.5250 | 0.11221  | 0.1133  |
| 154 | C | 6.1600  | -5.2870  | 16.4770 | -0.08346 | -0.0824 |
| 155 | C | 7.1680  | -6.3090  | 16.8880 | -0.30430 | -0.3032 |
| 156 | C | 7.3270  | -7.5380  | 16.3810 | -0.16953 | -0.1684 |
| 157 | C | 8.1390  | -8.6170  | 17.0680 | 0.00315  | 0.0043  |
| 158 | C | 9.5840  | -8.6600  | 16.4480 | -0.07652 | -0.0754 |
| 159 | C | 10.4260 | -9.6870  | 17.2000 | -0.28616 | -0.2851 |
| 160 | C | 11.6400 | -9.4220  | 17.7130 | -0.20108 | -0.2000 |
| 161 | C | 12.2440 | -10.5320 | 18.5670 | -0.04289 | -0.0418 |
| 162 | C | 13.2020 | -11.3920 | 17.7400 | -0.07755 | -0.0764 |
| 163 | C | 13.9360 | -12.4900 | 18.4300 | -0.22965 | -0.2285 |
| 164 | C | 15.2740 | -12.5690 | 18.4610 | -0.22084 | -0.2197 |
| 165 | C | 15.8830 | -13.5520 | 19.4750 | -0.03313 | -0.0320 |
| 166 | C | 16.2360 | -11.6990 | 17.6670 | -0.04201 | -0.0409 |
| 167 | H | 5.5554  | -2.0706  | 16.2979 | 0.38714  | 0.3882  |
| 168 | H | 5.5759  | -4.7629  | 18.4956 | -0.02624 | -0.0251 |
| 169 | H | 4.2928  | -5.5175  | 17.5497 | -0.01427 | -0.0132 |
| 170 | H | 6.7264  | -4.4282  | 16.1483 | 0.03867  | 0.0398  |
| 171 | H | 5.6321  | -5.7132  | 15.6367 | 0.08775  | 0.0889  |
| 172 | H | 7.8914  | -6.1326  | 17.6702 | 0.19408  | 0.1952  |
| 173 | H | 7.4692  | -7.7919  | 14.1864 | 0.04150  | 0.0426  |
| 174 | H | 5.8137  | -7.6108  | 14.7668 | 0.05479  | 0.0559  |
| 175 | H | 6.6789  | -9.0357  | 14.9997 | 0.05525  | 0.0564  |
| 176 | H | 7.6436  | -9.5662  | 16.9267 | 0.06910  | 0.0702  |
| 177 | H | 8.1919  | -8.3920  | 18.1230 | 0.01011  | 0.0112  |
| 178 | H | 10.0542 | -7.6916  | 16.5344 | 0.10552  | 0.1066  |
| 179 | H | 9.5333  | -8.9440  | 15.4072 | 0.07550  | 0.0766  |
| 180 | H | 10.1318 | -10.7088 | 17.3890 | 0.19135  | 0.1925  |
| 181 | H | 13.4301 | -8.0722  | 17.8092 | 0.06867  | 0.0698  |
| 182 | H | 11.9129 | -7.1974  | 17.6015 | 0.03978  | 0.0409  |
| 183 | H | 12.6135 | -8.0589  | 16.3428 | 0.03024  | 0.0313  |
| 184 | H | 11.4492 | -11.1542 | 18.9510 | 0.07013  | 0.0712  |
| 185 | H | 12.7845 | -10.0894 | 19.3906 | 0.02901  | 0.0301  |
| 186 | H | 13.9508 | -10.7400 | 17.3150 | 0.11841  | 0.1195  |
| 187 | H | 12.6332 | -11.8527 | 16.9459 | 0.03795  | 0.0391  |
| 188 | H | 13.4548 | -13.3019 | 18.9550 | 0.18142  | 0.1825  |
| 189 | H | 17.2155 | -11.5657 | 18.1020 | 0.08668  | 0.0878  |

|     |   |         |          |         |         |        |
|-----|---|---------|----------|---------|---------|--------|
| 190 | H | 15.8495 | -10.7416 | 17.3500 | 0.03878 | 0.0399 |
| 191 | H | 16.4637 | -12.1795 | 16.7269 | 0.05547 | 0.0566 |
| 192 | H | 1.8223  | 5.4178   | 21.0208 | 0.06160 | 0.0000 |
| 193 | H | -7.1048 | -0.9224  | 24.0518 | 0.46111 | 0.4622 |

**Table S6.** Charges for backbone atoms of His and Tyr residues (His384, His283, His282, His233, Tyr237) coordinating to the DNC metal atoms for deprotonated PRAa<sub>3</sub>.

| His | Final charge | Tyr | Final charge |
|-----|--------------|-----|--------------|
| N   | -0.4146      | N   | -0.4146      |
| H   | 0.2730       | H   | 0.2730       |
| C   | 0.5984       | C   | 0.5984       |
| O   | -0.5668      | O   | -0.5668      |
| CA  | 0.0199       | CA  | -0.0003      |
| HA  | 0.0892       | HA  | 0.0887       |

**Table S7.** Charges for backbone atoms of His and Tyr residues (His384, His283, His282, His233, Tyr237) coordinating to the DNC metal atoms for protonated PRAa<sub>3</sub>.

| His | Final charge | Tyr | Final charge |
|-----|--------------|-----|--------------|
| N   | -0.4146      | N   | -0.4146      |
| H   | 0.2730       | H   | 0.2730       |
| C   | 0.5984       | C   | 0.5984       |
| O   | -0.5668      | O   | -0.5668      |
| CA  | 0.0199       | CA  | -0.0003      |
| HA  | 0.0892       | HA  | 0.0887       |

**Table S8.** Charges and coordinates for the Cu<sub>A</sub> cluster model. Hydrogen link atoms are number 13, 17, 26, 32.

|    |   | Coordinates |         |         | ESP charge | final charge |
|----|---|-------------|---------|---------|------------|--------------|
| 1  | C | -18.1522    | 3.4218  | 30.9910 | -0.5867    | -0.5705      |
| 2  | C | -18.4372    | 4.0988  | 32.2910 | 0.2846     | 0.3009       |
| 3  | N | -18.0862    | 3.5418  | 33.4700 | -0.3921    | -0.3758      |
| 4  | C | -19.1292    | 5.2208  | 32.6120 | -0.2926    | -0.2764      |
| 5  | C | -18.5032    | 4.2728  | 34.4970 | 0.1060     | 0.1223       |
| 6  | N | -19.0922    | 5.3598  | 33.9740 | -0.2500    | -0.2337      |
| 7  | C | -17.3262    | -1.2892 | 32.7420 | -0.1664    | -0.1502      |
| 8  | S | -16.2912    | 0.2128  | 32.4560 | -0.2338    | -0.2176      |
| 9  | H | -19.6192    | 5.8816  | 31.9122 | 0.2687     | 0.2850       |
| 10 | H | -18.3871    | 4.0325  | 35.5435 | 0.1858     | 0.2020       |
| 11 | H | -16.8843    | -2.2592 | 32.5680 | 0.1287     | 0.1331       |

|    |    |          |         |         |         |         |
|----|----|----------|---------|---------|---------|---------|
| 12 | H  | -18.3448 | -1.2880 | 32.3830 | 0.1621  | 0.1331  |
| 13 | H  | -14.2758 | 4.2522  | 35.3758 | 0.1973  | 0.0000  |
| 14 | H  | -15.9522 | 4.7541  | 35.1563 | 0.1658  | 0.1615  |
| 15 | H  | -15.1644 | 3.8174  | 34.0830 | 0.0726  | 0.1615  |
| 16 | H  | -13.0305 | -0.4114 | 38.3905 | 0.2054  | 0.1983  |
| 17 | H  | -14.6802 | -0.6694 | 37.8227 | 0.1719  | 0.0000  |
| 18 | C  | -15.2762 | 3.9118  | 35.1530 | -0.3300 | -0.3138 |
| 19 | S  | -15.8732 | 2.2378  | 35.8850 | -0.1755 | -0.1593 |
| 20 | C  | -13.6912 | -0.3412 | 37.5390 | -0.5037 | -0.4875 |
| 21 | C  | -13.1622 | -0.9202 | 36.2650 | 0.2216  | 0.2378  |
| 22 | N  | -13.7682 | -0.7712 | 34.9990 | -0.2755 | -0.2593 |
| 23 | C  | -12.0592 | -1.6832 | 36.0970 | -0.3347 | -0.3185 |
| 24 | C  | -12.9812 | -1.3902 | 34.1110 | -0.0770 | -0.0608 |
| 25 | N  | -11.9722 | -1.9772 | 34.7520 | -0.1515 | -0.1353 |
| 26 | H  | -17.5280 | -1.3916 | 33.7980 | 0.0597  | 0.0000  |
| 27 | H  | -13.8185 | 0.7251  | 37.4243 | 0.1688  | 0.1983  |
| 28 | H  | -11.3836 | -1.9951 | 36.8797 | 0.2965  | 0.3127  |
| 29 | H  | -13.1364 | -1.4126 | 33.0424 | 0.2594  | 0.2756  |
| 30 | Cu | -15.0792 | 0.5298  | 34.4350 | 0.6429  | 0.6591  |
| 31 | Cu | -17.3092 | 1.6468  | 34.0310 | 0.7492  | 0.7654  |
| 32 | H  | -17.1981 | 3.6589  | 30.5440 | 0.2001  | 0.0000  |
| 33 | H  | -18.9293 | 3.5034  | 30.2454 | 0.2147  | 0.2103  |
| 34 | H  | -18.0835 | 2.3555  | 31.1479 | 0.1674  | 0.2103  |
| 35 | H  | -19.5469 | 6.0861  | 34.5087 | 0.4225  | 0.4388  |
| 36 | H  | -11.2365 | -2.5180 | 34.3202 | 0.4178  | 0.4340  |

**Table S9.** Charges for backbone atoms of His and Cys residues (His114<sup>II</sup>, His157<sup>II</sup>, Cys149<sup>II</sup>, and Cys153<sup>II</sup>) coordinating to the Cu<sub>A</sub> cluster model.

| His | Final charge | Cys | Final charge |
|-----|--------------|-----|--------------|
| N   | -0.3990      | N   | -0.3990      |
| H   | 0.2886       | H   | 0.2886       |
| C   | 0.6140       | C   | 0.6140       |
| O   | -0.5512      | O   | -0.5512      |
| CA  | -0.0414      | CA  | -0.0184      |
| HA  | 0.1527       | HA  | 0.0675       |

**Table S10.** Charges and coordinates for the heme b cluster model. Hydrogen link atoms are number 96,97.

|   |   | Coordinate |         | ESP Charge | Final Charge |         |
|---|---|------------|---------|------------|--------------|---------|
| 1 | C | 0.9340     | -1.0870 | 39.2210    | -0.0383      | -0.0373 |

|    |    |         |         |         |         |         |
|----|----|---------|---------|---------|---------|---------|
| 2  | H  | 0.8140  | -1.4670 | 40.2360 | 0.0587  | 0.0585  |
| 3  | H  | -0.0480 | -0.9390 | 38.7710 | 0.0626  | 0.0585  |
| 4  | C  | 1.6030  | -2.1620 | 38.4400 | -0.0487 | -0.0477 |
| 5  | N  | 2.5720  | -2.9730 | 39.0090 | -0.0535 | -0.0525 |
| 6  | H  | 2.9370  | -2.8770 | 39.9460 | 0.3700  | 0.3710  |
| 7  | C  | 2.9390  | -3.8990 | 38.1110 | -0.3042 | -0.3032 |
| 8  | H  | 3.7030  | -4.6410 | 38.3440 | 0.2730  | 0.2740  |
| 9  | N  | 2.2270  | -3.7030 | 37.0160 | -0.1621 | -0.1611 |
| 10 | C  | 1.3550  | -2.6620 | 37.1780 | -0.2284 | -0.2274 |
| 11 | H  | 0.6630  | -2.4010 | 36.3770 | 0.2287  | 0.2297  |
| 12 | C  | 3.2440  | -8.0580 | 30.7870 | 0.0416  | 0.0426  |
| 13 | H  | 2.4380  | -8.6640 | 30.3730 | 0.0364  | 0.0349  |
| 14 | H  | 3.9520  | -8.7030 | 31.3080 | 0.0329  | 0.0349  |
| 15 | C  | 2.6240  | -7.1720 | 31.8280 | 0.0398  | 0.0408  |
| 16 | N  | 1.3040  | -6.7990 | 31.8030 | -0.1891 | -0.1881 |
| 17 | H  | 0.6680  | -7.0710 | 31.0670 | 0.3910  | 0.3920  |
| 18 | C  | 1.0040  | -6.0550 | 32.8530 | -0.1911 | -0.1901 |
| 19 | H  | 0.0010  | -5.6600 | 33.0120 | 0.2181  | 0.2191  |
| 20 | N  | 2.1010  | -5.9340 | 33.5650 | -0.0857 | -0.0847 |
| 21 | C  | 3.1400  | -6.6420 | 32.9560 | -0.3022 | -0.3012 |
| 22 | H  | 4.1250  | -6.6710 | 33.4210 | 0.2001  | 0.2011  |
| 23 | Fe | 2.1890  | -4.8630 | 35.2990 | 0.4212  | 0.4212  |
| 24 | N  | 0.4910  | -5.6790 | 35.6350 | 0.1963  | 0.1973  |
| 25 | C  | -0.8450 | -5.1970 | 35.3160 | -0.3499 | -0.3489 |
| 26 | C  | -1.8010 | -6.2940 | 35.3980 | 0.2177  | 0.2187  |
| 27 | C  | -3.2170 | -6.2310 | 35.0040 | 0.1095  | 0.1105  |
| 28 | H  | -3.5850 | -7.2440 | 34.8400 | 0.0259  | 0.0269  |
| 29 | H  | -3.3040 | -5.6590 | 34.0800 | -0.0213 | -0.0203 |
| 30 | C  | -4.0620 | -5.5770 | 36.0540 | -0.0743 | -0.0733 |
| 31 | H  | -3.4960 | -4.7980 | 36.5650 | -0.0004 | 0.0006  |
| 32 | H  | -4.1970 | -6.4270 | 36.7230 | 0.0575  | 0.0585  |
| 33 | C  | -5.3850 | -5.0460 | 35.6580 | 0.5908  | 0.5918  |
| 34 | O  | -6.3060 | -4.7340 | 36.4620 | -0.6547 | -0.6537 |
| 35 | O  | -5.7620 | -5.0000 | 34.2800 | -0.6863 | -0.6853 |
| 36 | C  | -1.2010 | -7.3010 | 36.0470 | -0.0887 | -0.0877 |
| 37 | C  | -1.7740 | -8.6880 | 36.4110 | -0.0608 | -0.0598 |
| 38 | H  | -2.0620 | -9.2130 | 35.5000 | 0.0693  | 0.0703  |
| 39 | H  | -1.0170 | -9.2670 | 36.9400 | 0.0271  | 0.0281  |
| 40 | H  | -2.6480 | -8.5640 | 37.0500 | 0.0862  | 0.0872  |
| 41 | C  | 0.1470  | -6.9350 | 36.2410 | -0.2117 | -0.2107 |
| 42 | C  | 1.0730  | -7.7580 | 36.8300 | -0.1624 | -0.1614 |



|    |   |         |          |         |         |         |
|----|---|---------|----------|---------|---------|---------|
| 43 | H | 0.8840  | -8.7230  | 37.2780 | 0.3431  | 0.3441  |
| 44 | C | 2.4860  | -7.3740  | 36.8720 | -0.1868 | -0.1858 |
| 45 | N | 3.1100  | -6.2990  | 36.3710 | 0.1403  | 0.1413  |
| 46 | C | 3.4200  | -8.2000  | 37.4900 | -0.0894 | -0.0884 |
| 47 | C | 3.1340  | -9.4510  | 38.3370 | 0.0456  | 0.0466  |
| 48 | H | 2.6000  | -10.1850 | 37.7330 | -0.0156 | -0.0146 |
| 49 | H | 4.0750  | -9.8800  | 38.6820 | 0.0437  | 0.0447  |
| 50 | H | 2.5240  | -9.1760  | 39.1970 | 0.0342  | 0.0352  |
| 51 | C | 4.6550  | -7.5910  | 37.4240 | 0.0338  | 0.0348  |
| 52 | C | 5.9280  | -7.8980  | 37.8100 | -0.2082 | -0.2072 |
| 53 | H | 6.7450  | -7.7400  | 37.1220 | 0.1888  | 0.1898  |
| 54 | C | 6.1960  | -8.4500  | 39.1760 | -0.4311 | -0.4301 |
| 55 | H | 5.3790  | -8.6080  | 39.8640 | 0.2155  | 0.2165  |
| 56 | H | 7.2060  | -8.6900  | 39.4730 | 0.1961  | 0.1971  |
| 57 | C | 4.4050  | -6.3990  | 36.5980 | -0.0152 | -0.0142 |
| 58 | C | 5.4660  | -5.7080  | 36.1880 | -0.2586 | -0.2576 |
| 59 | H | 6.3010  | -5.4300  | 36.8140 | 0.2511  | 0.2520  |
| 60 | C | 5.2520  | -4.6650  | 35.1230 | 0.0518  | 0.0528  |
| 61 | N | 3.9500  | -4.2580  | 34.8740 | 0.1297  | 0.1307  |
| 62 | C | 6.1400  | -3.7540  | 34.8090 | 0.0106  | 0.0116  |
| 63 | C | 7.6230  | -3.9210  | 34.9700 | -0.1511 | -0.1501 |
| 64 | H | 7.9610  | -4.7680  | 34.3730 | 0.0981  | 0.0991  |
| 65 | H | 8.1300  | -3.0160  | 34.6340 | 0.1028  | 0.1038  |
| 66 | H | 7.8570  | -4.1000  | 36.0190 | 0.0479  | 0.0489  |
| 67 | C | 5.5750  | -2.9280  | 33.7950 | 0.0036  | 0.0046  |
| 68 | C | 6.3250  | -1.7880  | 33.1430 | -0.0166 | -0.0156 |
| 69 | H | 5.6060  | -1.0490  | 32.8220 | 0.1283  | 0.1293  |
| 70 | C | 7.6350  | -1.5870  | 32.9290 | -0.5394 | -0.5384 |
| 71 | H | 8.3540  | -2.3260  | 33.2500 | 0.2601  | 0.2611  |
| 72 | H | 7.9700  | -0.6860  | 32.4360 | 0.2572  | 0.2581  |
| 73 | C | 4.3060  | -3.1120  | 34.0770 | -0.2437 | -0.2427 |
| 74 | C | 3.2700  | -2.2920  | 33.4430 | -0.2148 | -0.2138 |
| 75 | H | 3.4260  | -1.4390  | 32.8000 | 0.3112  | 0.3122  |
| 76 | C | 1.9600  | -2.4710  | 33.6580 | -0.0985 | -0.0975 |
| 77 | N | 1.2270  | -3.3930  | 34.2810 | 0.1245  | 0.1255  |
| 78 | C | 0.9420  | -1.5050  | 33.2340 | -0.0871 | -0.0861 |
| 79 | C | 1.2530  | -0.3830  | 32.2350 | -0.0005 | 0.0005  |
| 80 | H | 1.5840  | -0.8170  | 31.2920 | 0.0088  | 0.0098  |
| 81 | H | 0.3560  | 0.2120   | 32.0650 | 0.0795  | 0.0805  |
| 82 | H | 2.0400  | 0.2540   | 32.6370 | 0.0068  | 0.0078  |
| 83 | C | -0.2980 | -1.9000  | 33.6120 | -0.1975 | -0.1965 |

|    |   |         |         |         |         |         |
|----|---|---------|---------|---------|---------|---------|
| 84 | C | -0.0930 | -3.1810 | 34.2820 | 0.0226  | 0.0236  |
| 85 | C | -1.1870 | -3.8610 | 34.7050 | -0.1226 | -0.1216 |
| 86 | H | -2.1730 | -3.4460 | 34.5540 | 0.3053  | 0.3063  |
| 87 | C | -1.6580 | -1.4520 | 33.1780 | -0.0301 | -0.0291 |
| 88 | H | -2.3980 | -2.2470 | 33.2670 | 0.0068  | 0.0078  |
| 89 | H | -1.6560 | -1.0700 | 32.1570 | 0.0648  | 0.0658  |
| 90 | C | -2.0490 | -0.3000 | 34.1390 | 0.2817  | 0.2827  |
| 91 | H | -1.3490 | 0.5310  | 34.0530 | -0.0303 | -0.0293 |
| 92 | H | -2.0450 | -0.6730 | 35.1630 | -0.0446 | -0.0436 |
| 93 | C | -3.4230 | 0.1660  | 33.7830 | 0.4773  | 0.4783  |
| 94 | O | -3.9190 | 1.2320  | 34.1700 | -0.6035 | -0.6025 |
| 95 | O | -4.2460 | -0.5330 | 33.0330 | -0.6108 | -0.6098 |
| 96 | H | 1.5490  | -0.2190 | 39.3350 | 0.0511  | 0.0000  |
| 97 | H | 3.6720  | -7.4750 | 29.9990 | 0.0325  | 0.0000  |

**Table S11.** Charges for backbone atoms of His residues (His72, His386) coordinating to the heme b cluster model.

| <b>His</b> | <b>Final charge</b> |
|------------|---------------------|
| N          | -0.4147             |
| H          | 0.2729              |
| C          | 0.5983              |
| O          | -0.5669             |
| CA         | 0.0198              |
| HA         | 0.0891              |

#### 4. Stability of MD trajectories

In order to check the stability of our trajectories after equilibration, we have investigated the RMSD deviation of  $C_\alpha$  backbone atoms and the area per lipid. We can clearly see that the simulations are stable with an RMSD of 1 Å to 1.5 Å throughout the simulations (Figure S1) and a stable area per lipid of approximately 60 Å<sup>2</sup> (Figure S2).

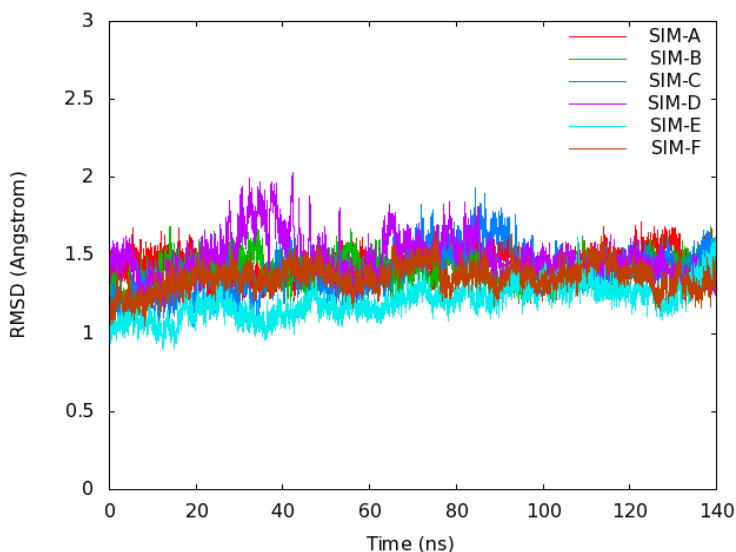

**Figure S1.** The RMSD of CcO protein  $C_\alpha$ -backbone atoms for all simulations with protonation states considered in this work. The crystal structure serves as the reference structure.

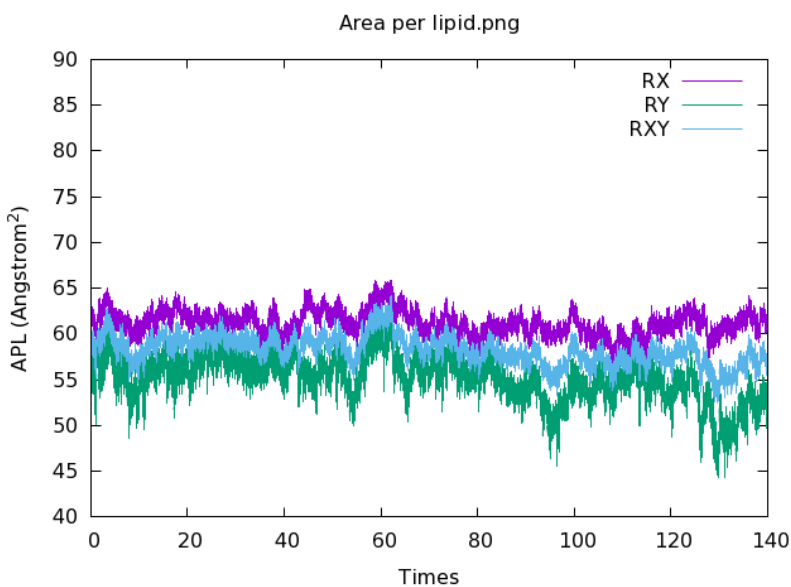

**Figure S2.** The area per lipid for simulation A. Results for simulations of all the other protonation states are equivalent. For details how the area per lipid was calculated, see below.

The area per lipid ( $A_{\text{lipid}}$ ) was obtained from the lateral area  $A_{\text{system}}$  of the simulation box, the approximate lateral area occupied by the protein,  $A_{\text{protein}}$  and the number of lipids in each leaflet ( $n_{\text{lipid}}$ ):

$$A_{\text{lipid}} = \frac{A_{\text{system}} - A_{\text{protein}}}{n_{\text{lipid}}}$$

The lateral area of the protein was approximately circle shaped and  $A_{\text{protein}}$  was therefore calculated as the area of a circle:

$$A_{\text{protein}} = \pi R^2$$

$R$  is the radius of the protein. Because the protein at the lipid:water interface was not perfectly circle shaped, slightly different diameters were measured in the X and Y dimensions. Three different  $A_{\text{protein}}$  values, and thereby three different area per lipid values (Figure S1), were calculated using the radius of the protein in the X dimension (RX), its radius in the Y dimension (RY) and the average of the two values (RXY).

## 5. Distance analysis for the salt bridges Arg225–Asp287 and Arg225–Glu126<sup>II</sup>

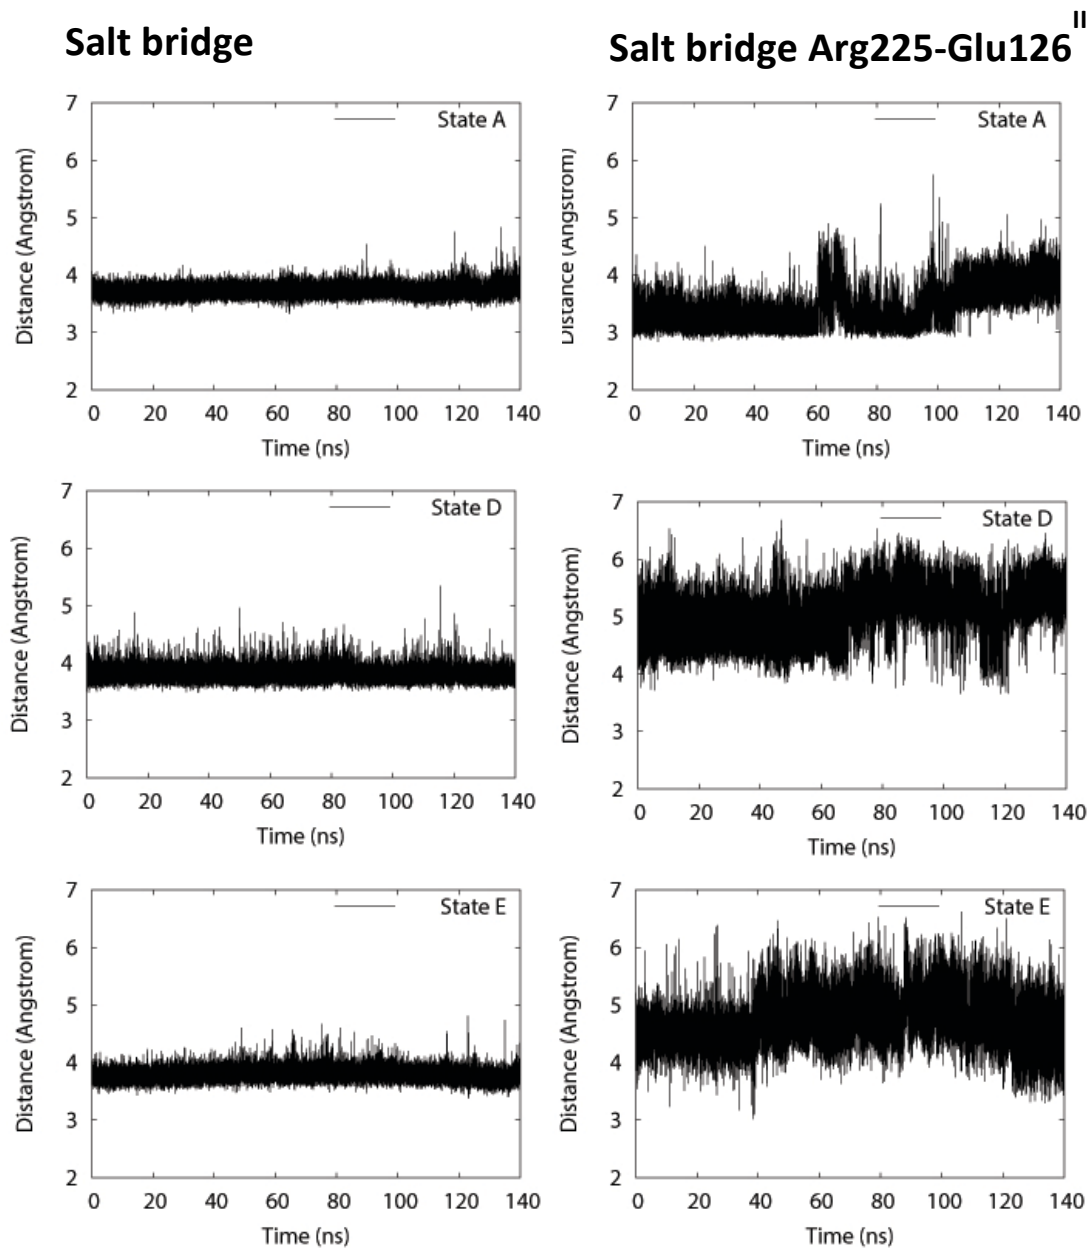

**Figure S3.** The distances between the center of mass of the side chain groups for the salt bridges Arg225-Asp287 (left) and Arg225-Glu126<sup>II</sup> (right) for protonation states A (top), D (middle) and E (bottom).

## 6. Distance analysis for the residues at each side of the entrance of water pathway 2

The distances between the residues at each side of the entrance of water exit pathway 2 for two representative simulations that are shown in the manuscript to describe the water pathways are shown in Figure S4. The distance is the center-of-mass distance between the side chains of the residues.

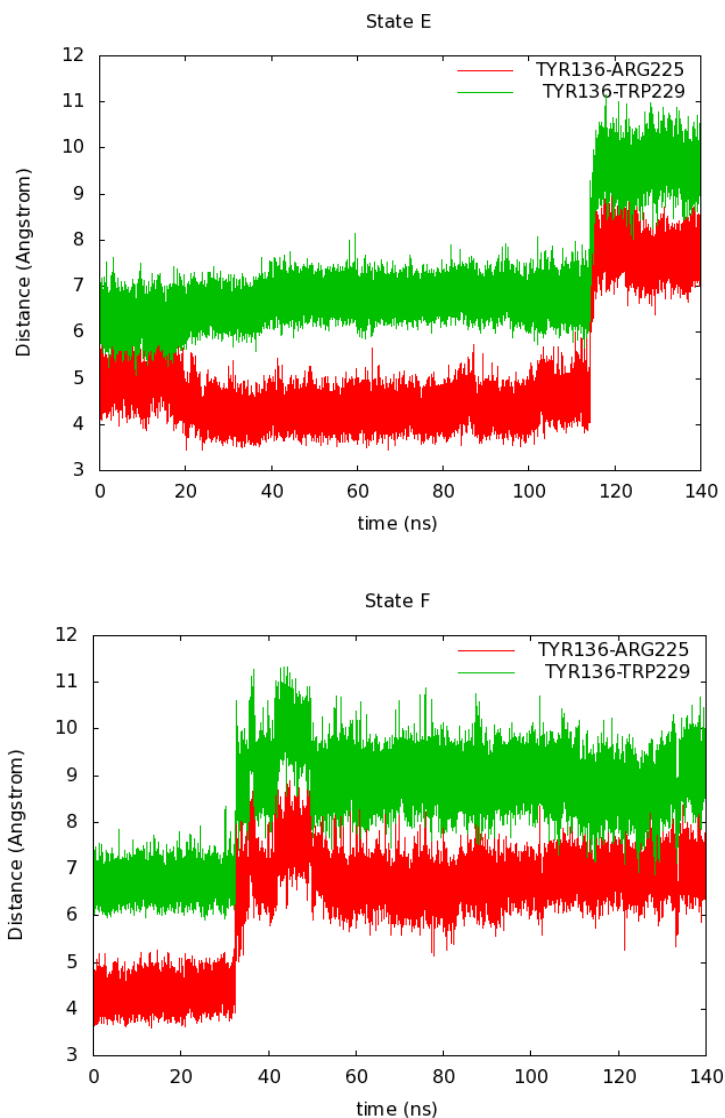

**Figure S4.** The distances between the centers of mass (COM) of the side chain groups of residues Tyr136 and Arg225 and of residues Tyr136 and Trp229 in state E and F.

## 7. Comparison of exit pathway P1 to pathway exit-R in aa<sub>3</sub>-type CcOs

Here we compare the water exit pathway P1 that we observed in our MD simulations to the alternative exit-R pathway that has been proposed by Sugitani and Stuchebrukhov [*Biochim. Biophys. Acta, Bioenerg.*, 1787 (2009) 1140-1150] based on structural comparisons to water transport pathways in aa<sub>3</sub>-type CcOs. Figure S5 shows that the observed pathway (top panels) is consistent with the pathway proposed by Sugitani *et al.* (bottom right panel) based on comparison to the exit-R pathway in aa<sub>3</sub>-type CcOs (bottom left panel).

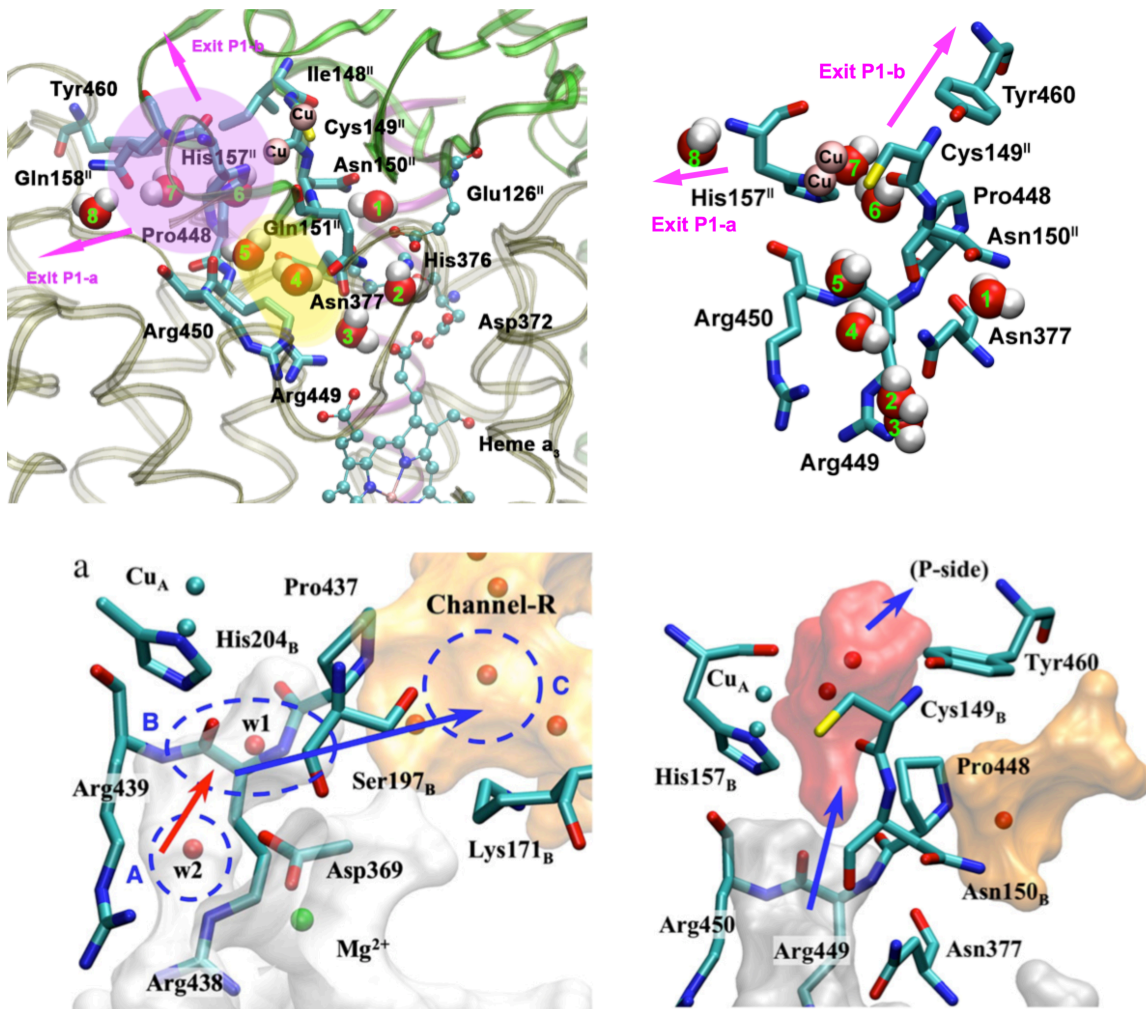

**Figure S5.** Top: Water exit pathway P1 observed in our MD simulations of *ba*<sub>3</sub>-type CcO from *Thermus thermophilus* represented in two different orientations. Bottom left: Water exit-R pathway in aa<sub>3</sub>-type CcOs identified by Sugitani and Stuchebrukhov. Bottom right: Alternative exit-R pathway proposed for *ba*<sub>3</sub>-type CcOs by Sugitani and Stuchebrukhov based on structural comparisons. The figures in the bottom panel were reproduced from R. Sugitani, A.A. Stuchebrukhov, *Biochim. Biophys. Acta*, 1787 (2009) 1140-1150.

## 8. Water occupancy of water exit pathways P1 and P2 for all simulations

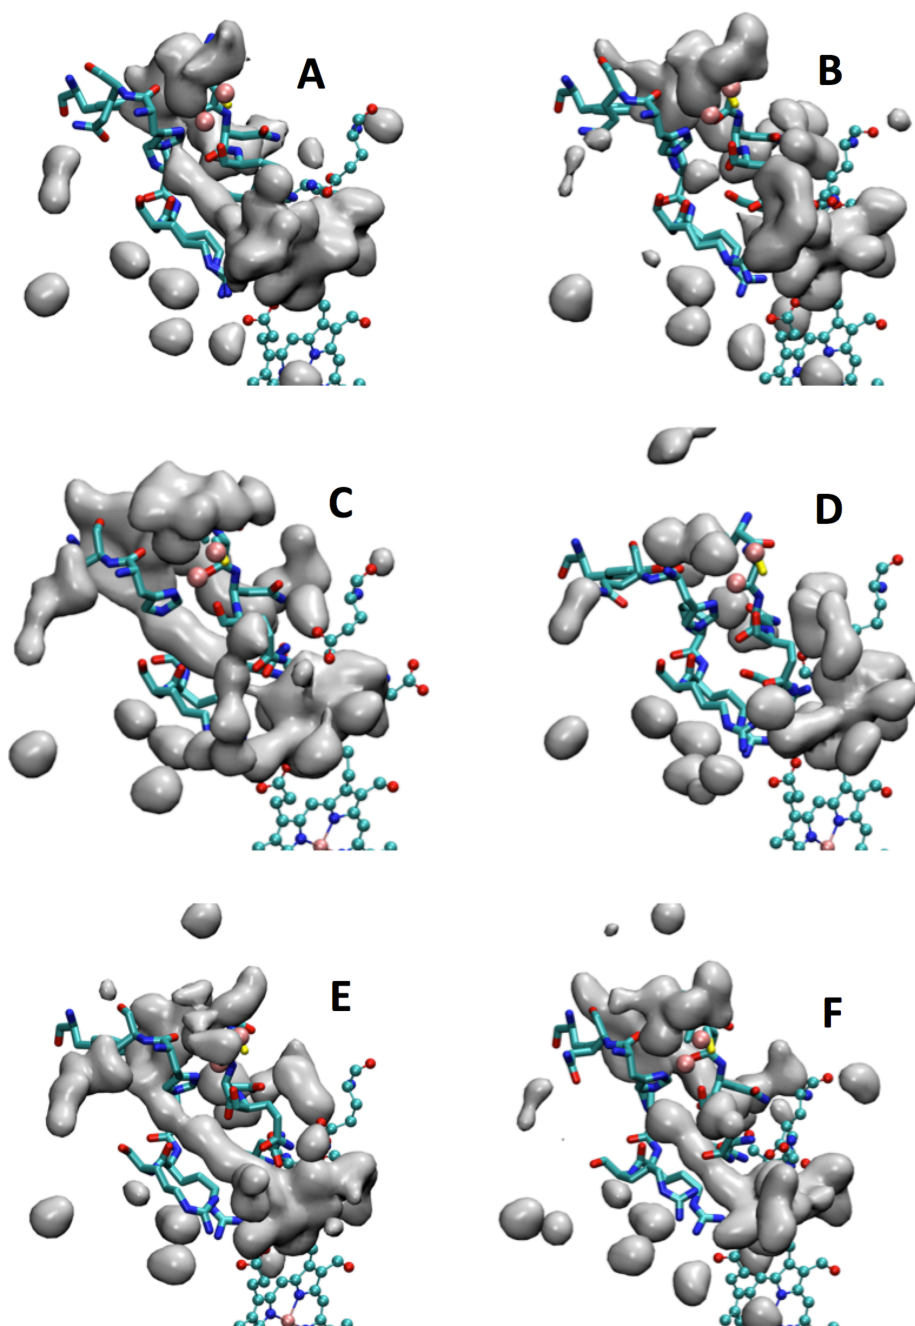

**Figure S6.** Water exit pathway P1. Isosurface plots at 25% water occupancy averaged over the entire trajectory for all protonation states A to D. The absence of water along pathway P1 indicates that this pathway is disrupted in state D.



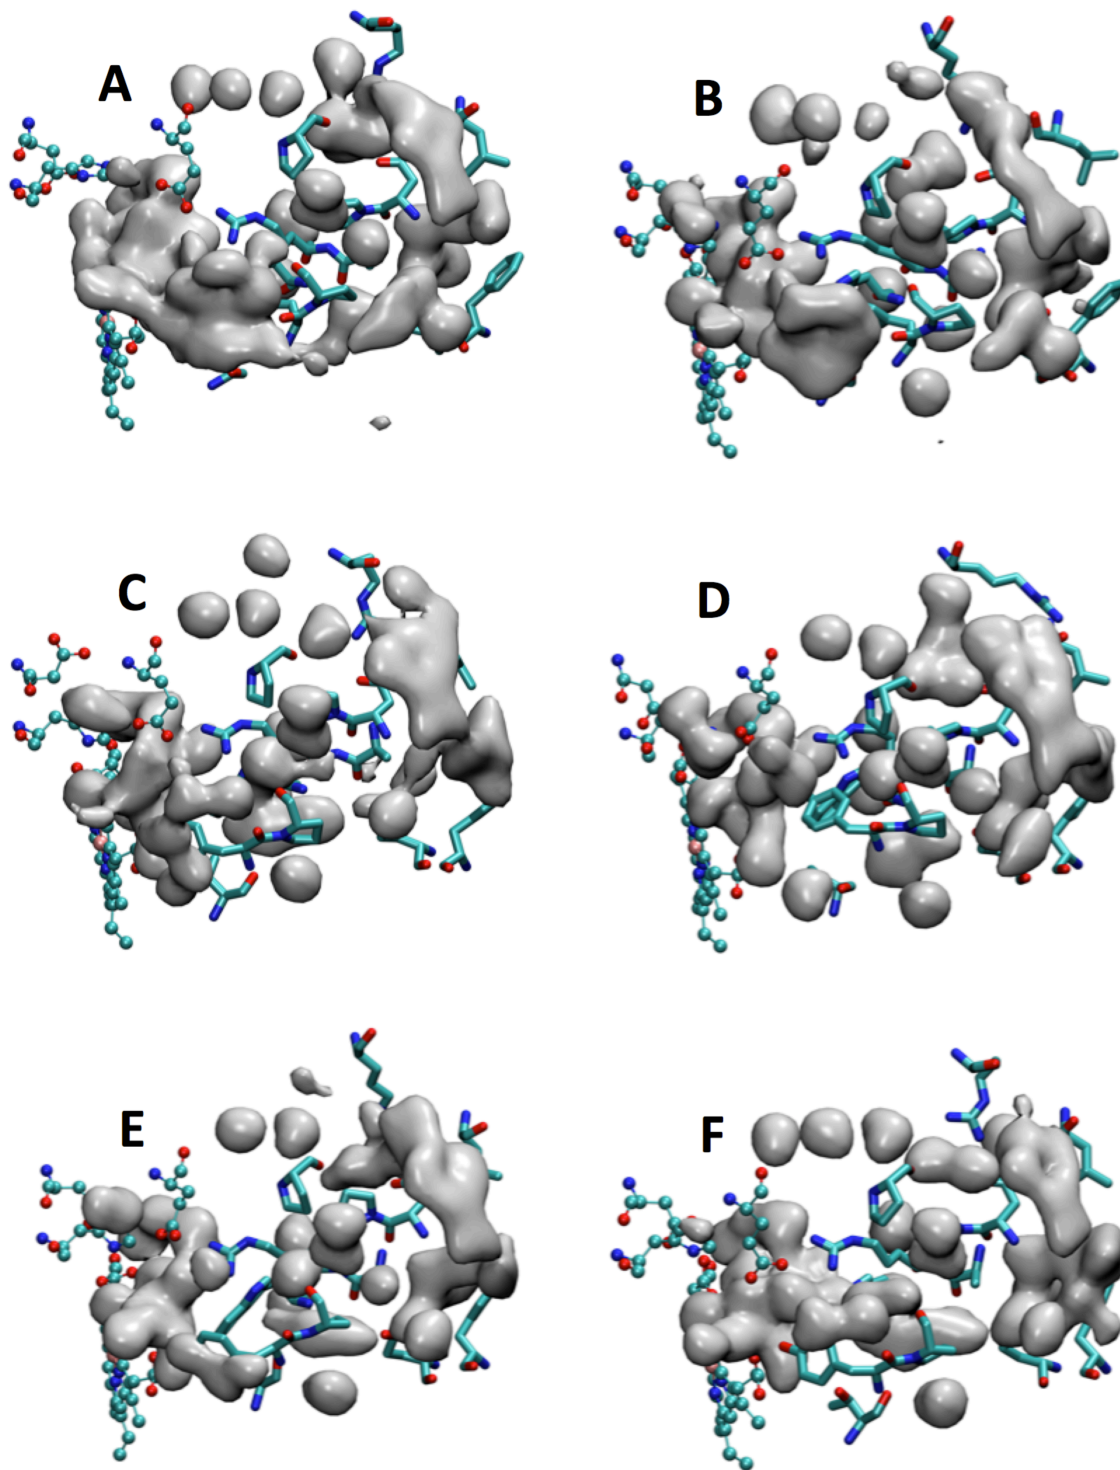

**Figure S7.** Water exit pathway P2. Isosurface plots at 25% water occupancy averaged over the entire trajectory for all protonation states A to D. The conformation of residue Tyr136 that blocks the entry to pathway P2 can clearly be seen for simulation D.
